# Supplementary material for: Glycogen synthase kinase 3 has a limited role in cell cycle regulation of cyclin D1 levels
Source: Springer Nature journal article supplement (doi:10.1186/1471-2121-7-33), 2006-08-30
Supplement: Additional file 4 [file 1471-2121-7-33-s4.pdf]

A

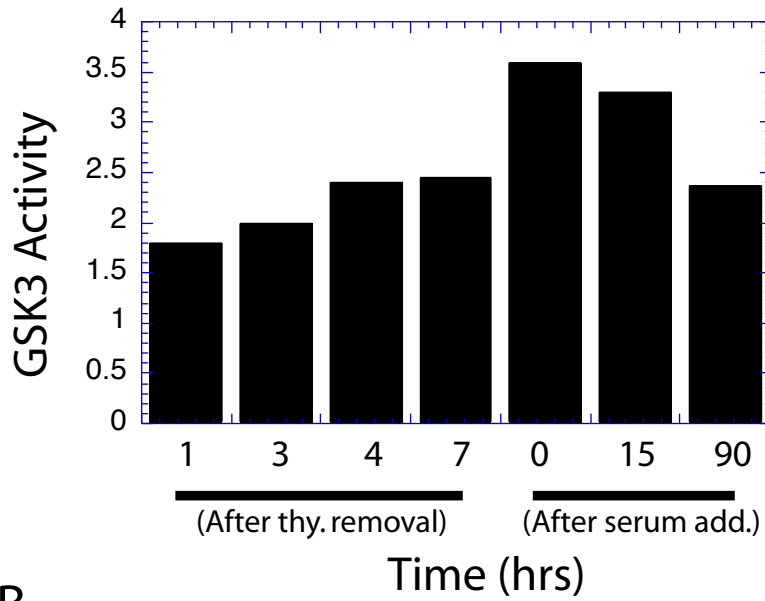

B

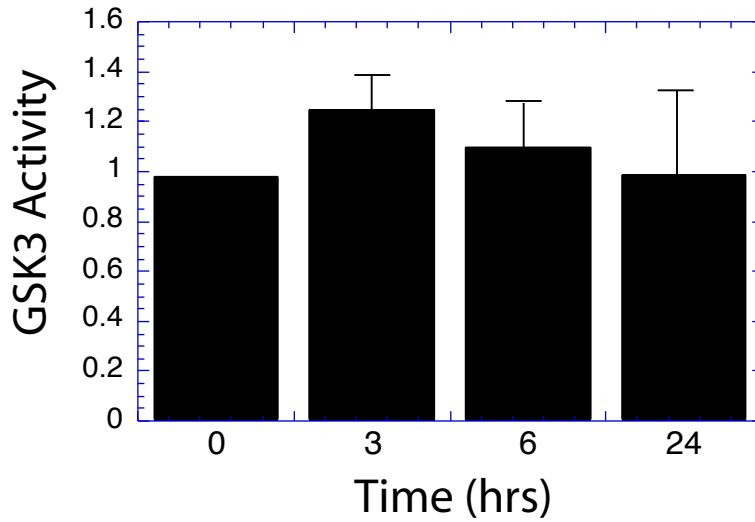

Supplementary Figure D
